# Supplementary material for: Sex- and Age-Dependent Neuroimmune Dysregulation and Early Neurodegenerative Signatures Following SARS-CoV-2 Infection in Golden Syrian Hamsters
Source: Research Square preprint supplement (doi:10.21203/rs.3.rs-9130692/v1), 2026-04-07
Supplement: Supplementary file 1 [file 477723bae5e60a5f7999d546.docx]

**RNA-seq datasets  (Reviewer access via GEO)**

To facilitate reviewer access to raw sequencing data before publication, the RNA-seq datasets have also been submitted to GEO, which supports controlled access to reviewer access to downloadable files is supports controlled access to downloadble files;

1. **Brain and Lung transcriptomic datasets**

GEO accession: GSE326901

Access link: [https://www.ncbi.nlm.nih.gov/geo/query/acc.cgi?acc=GSE326901](https://urldefense.com/v3/__https:/www.ncbi.nlm.nih.gov/geo/query/acc.cgi?acc=GSE326901__;!!NLFGqXoFfo8MMQ!rQk69VpnQSLODUigYUmWGDN9U7J6wzxuyTa5se7_bvwIdwqzxZ-DI4Gg5G5MGLDwACuNa_-jCgGpAjZrHxH_2hQpv-Q7$)

Reviewer access token: **wxanskucdhgxhgb**

1. **Heart transcriptomic data**

GEO accession: GSE326918

Access link: [https://www.ncbi.nlm.nih.gov/geo/query/acc.cgi?acc=GSE326918](https://urldefense.com/v3/__https:/www.ncbi.nlm.nih.gov/geo/query/acc.cgi?acc=GSE326918__;!!NLFGqXoFfo8MMQ!rQk69VpnQSLODUigYUmWGDN9U7J6wzxuyTa5se7_bvwIdwqzxZ-DI4Gg5G5MGLDwACuNa_-jCgGpAjZrHxH_2tDCbiOX$)

Reviewer access token: **gfydqqaclzabbov**

1. **16S rRNA sequencing data (publicly available)**

The 16S microbiome dataset has been made publicly available in SRA

BioProject accession: PRJNA1337707

Link- [https://www.ncbi.nlm.nih.gov/bioproject/PRJNA1337707](https://urldefense.com/v3/__https:/www.ncbi.nlm.nih.gov/bioproject/PRJNA1337707__;!!NLFGqXoFfo8MMQ!rQk69VpnQSLODUigYUmWGDN9U7J6wzxuyTa5se7_bvwIdwqzxZ-DI4Gg5G5MGLDwACuNa_-jCgGpAjZrHxH_2kMhfxgw$)
